# Supplementary material for: Controllable synthesis of biosourced blue-green fluorescent carbon dots from camphor for the detection of heavy metal ions in water
Source: Royal Society of Chemistry journal article supplement (doi:10.1039/c4ra10471d), 2014-01-01
Supplement: c4ra10471d1.pdf [file c4ra10471d1.pdf]

## Controllable synthesis of biosourced blue-green fluorescent Carbon dots from camphor for the detection of heavy metal ions in water

Rohit Ranganathan Gaddam,<sup>a,b</sup> Vasudevan Devanath,<sup>c</sup> Ramanuj Narayan,<sup>a</sup> and KVSN Raju<sup>\*a</sup>

<sup>a</sup> Polymers and Functional Materials Division, Indian Institute of Chemical Technology, Tarnaka 500007, Andhra Pradesh. E-mail: [drkvsnraju@gmail.com](mailto:drkvsnraju@gmail.com)

<sup>b</sup> Amity Institute of Nanotechnology, Amity University, Noida 201301, Uttar Pradesh, India.

<sup>c</sup> Electrodics and electrocatalysis division, Central Electrochemical Research Institute, Karaikudi-630006, Tamil Nadu, Email : [vasudevand@rediffmail.com](mailto:vasudevand@rediffmail.com)

\*Corresponding author. : E-mail addresses: [drkvsnraju@gmail.com](mailto:drkvsnraju@gmail.com)

---

### Electronic Supplementary Information

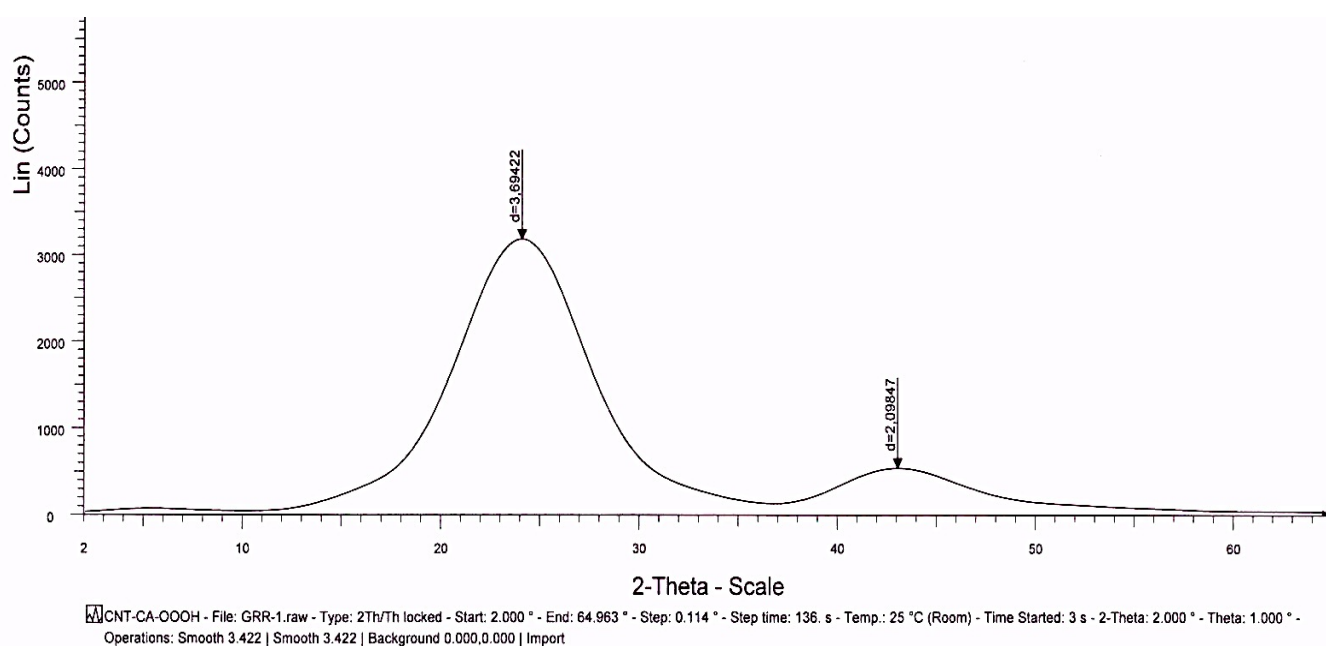

**Figure S1** X-ray Diffraction pattern of Camphoric carbon soot

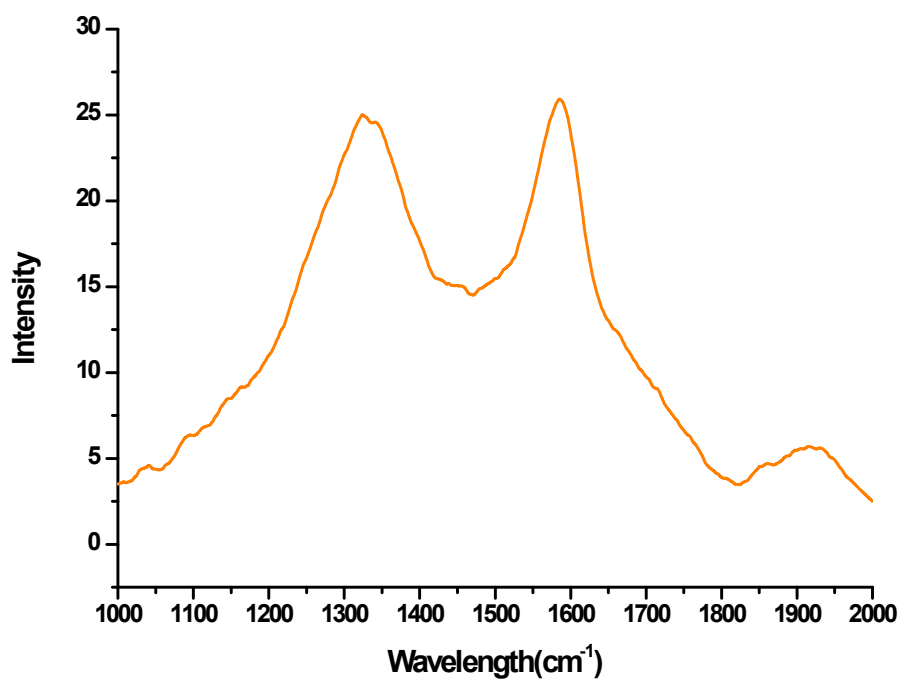

Figure S2 FTIR spectra of as prepared camphoric carbon soot

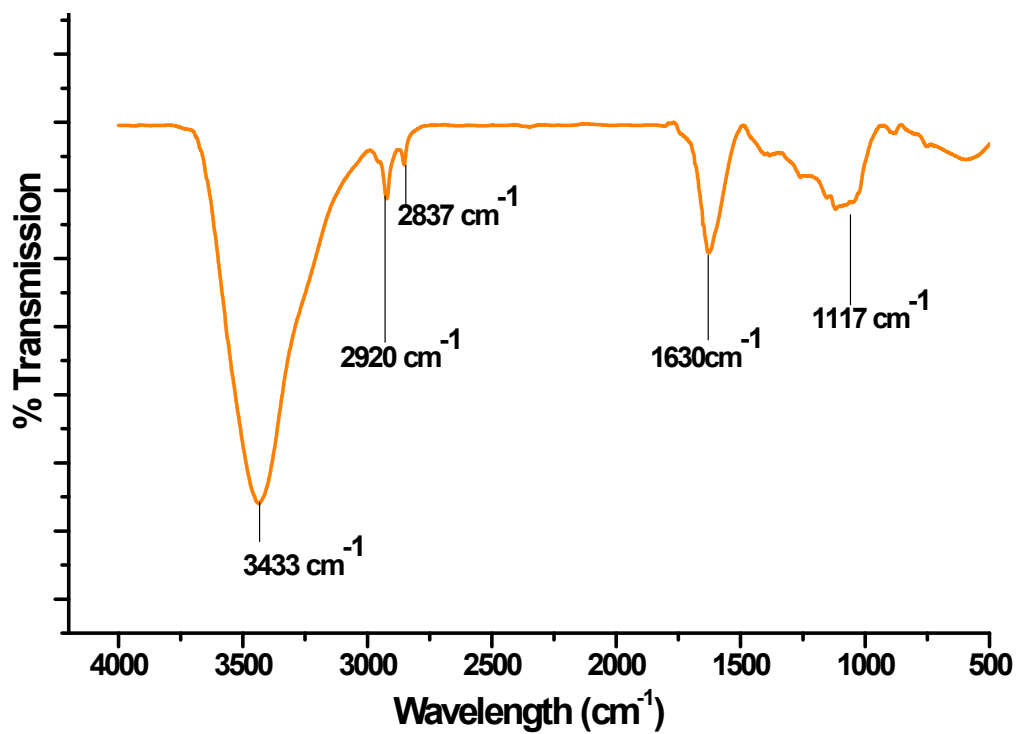

**Figure S3** FTIR spectra of as prepared camphoric carbon soot

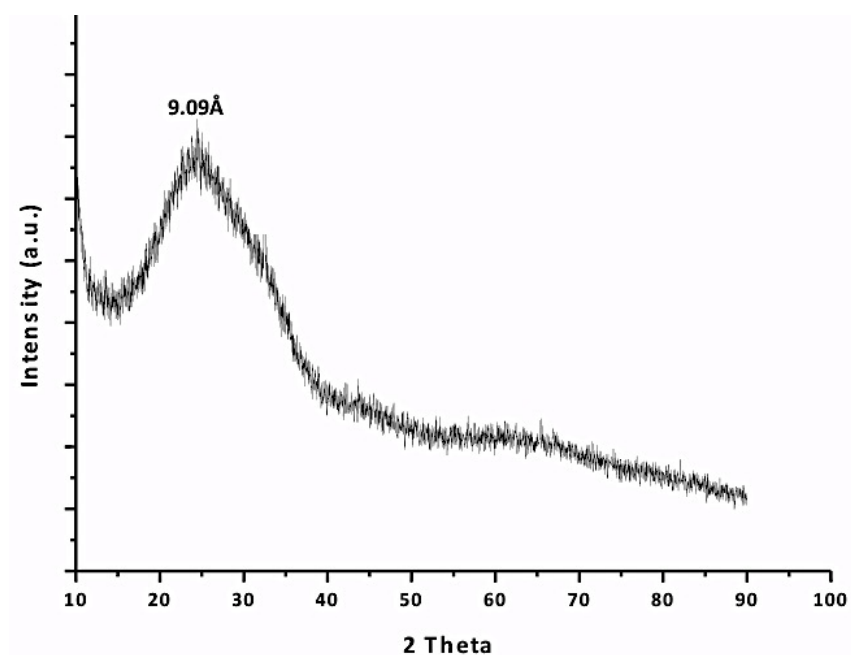

**Figure S4** X-Ray Diffraction profile of carbon dots

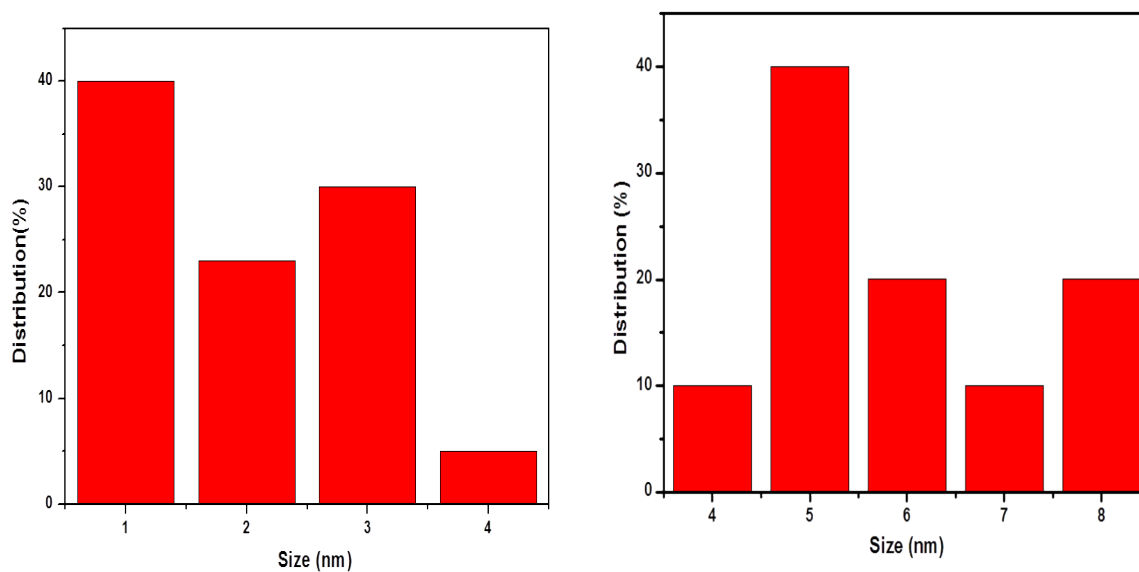

**Figure S5.** Size distribution profile of C dots before dialysis (left) and after dialysis (right)

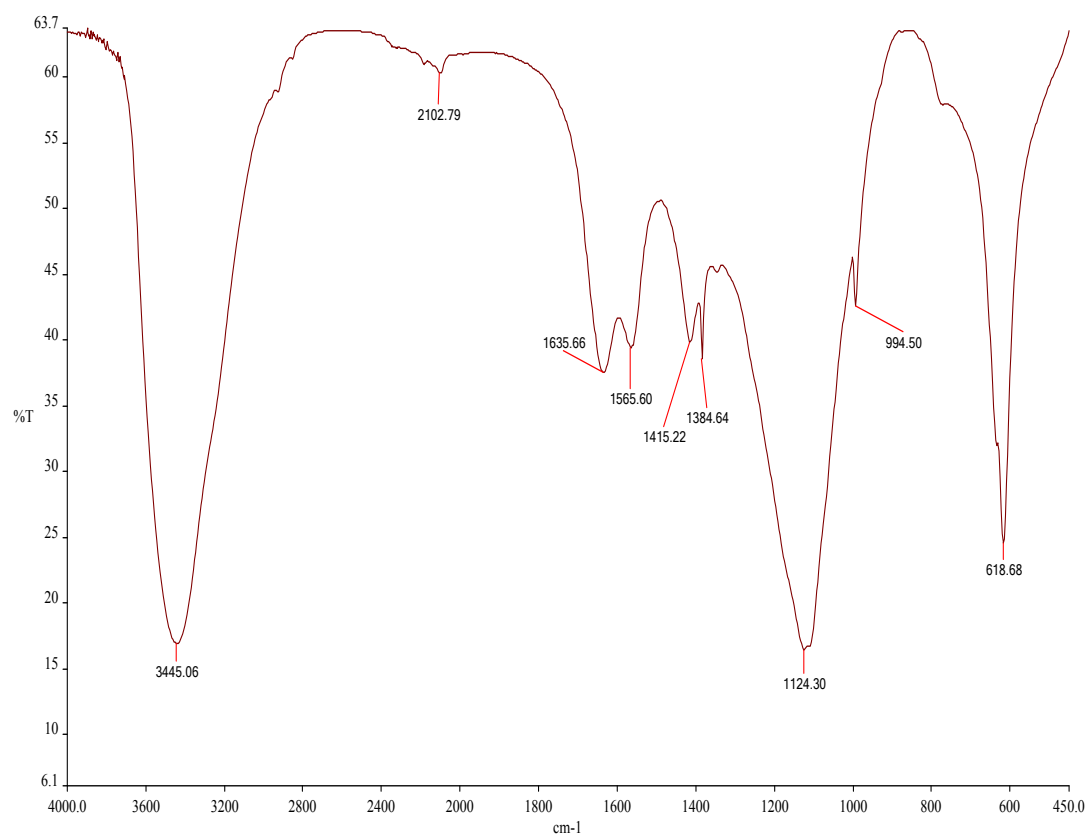

**Figure S6** FTIR spectra of C dots before dialysis

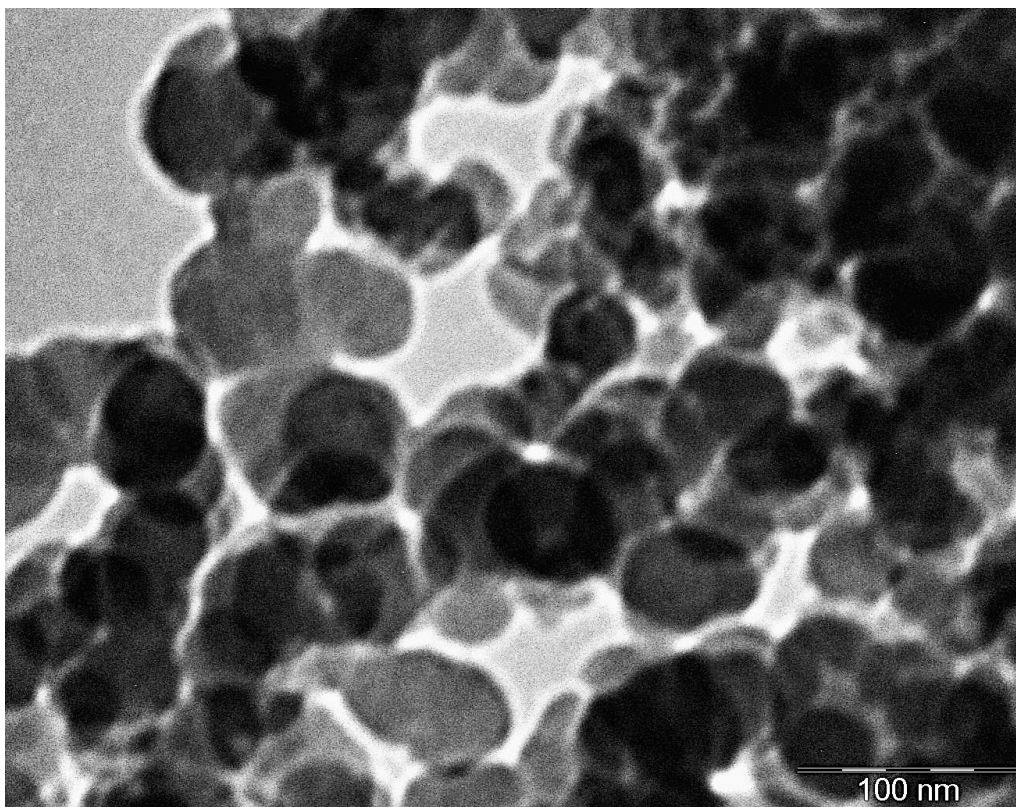

**Figure S7** TEM image of as prepared camphoric carbon soot

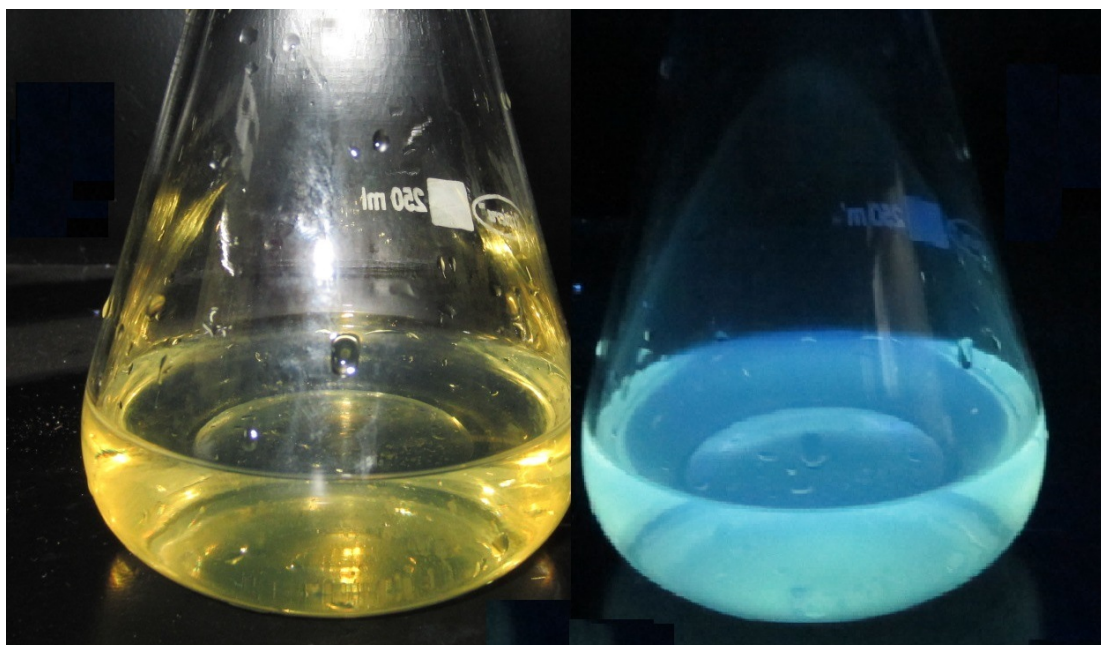

**Figure S8** As prepared carbon dots (left) viewed under ultraviolet light (right)

## Quantum Yield Measurements

Quinine sulfate in 0.1 M H<sub>2</sub>SO<sub>4</sub> was used as a standard to determine the quantum yield of C dots. The absorbance and emission spectra of the standard were recorded. The pure C dot absorbance and emission was also taken (figures already in the manuscript Fig. 6a and 6b). The following formula was used to determine the quantum yield of C dot<sup>1</sup>:

$$\Phi_{\text{C dot}} = \Phi_{\text{Std}} \left[ \frac{I_{\text{C dot}}}{I_{\text{std}}} \right] \left[ \frac{A_{\text{std}}}{A_{\text{C dot}}} \right] \left[ \frac{\eta_{\text{C dot}}}{\eta_{\text{std}}} \right]^2$$

Where  $\Phi$  is the quantum yield, I is the measured integrated emission intensity,  $\eta$  is the refractive index, and A is the optical density. The subscript “std” refers to the reference fluorophore of known quantum yield. The subscript C dot refers to the pure graphene quantum dot. The quantum yield of the C dot is found to be 21.16% according to the above equation.

Reference:

1. Lakowicz, J. R. *Principles of Fluorescence Spectroscopy*, 2nd Ed., 1999, Kluwer Academic/Plenum Publishers, New York.
